# Supplementary material for: Incongruity between Affinity Patterns Based on Mandibular and Lower Dental Dimensions following the Transition to Agriculture in the Near East, Anatolia and Europe
Source: PLoS One. 2015 Feb 4;10(2):e0117301. doi: 10.1371/journal.pone.0117301 (PMC4317182; doi:10.1371/journal.pone.0117301)
Supplement: S1 Table — (XLS) [file pone.0117301.s002.xls]

## Sheet: Sheet1
Specimen	Location	Phase	Period	DATE BP	Context	Reference	Sex	Lab	DATE UNCAL	SD	C14_Ref	Lat	Long	Arch Period	Period_Code	RAMH	MAXL	GONANG	RAMB	GONB	CONDB	ANTH	PM2_M1	ANTTHIC	M2THIC	countman	UI1MD	UI1BL	UI2MD	UI2BL	UCMD	UCBL	UP3MD	UP3BL	UP4MD	UP4BL	UM1MD	UM1BL	UM2MD	UM2BL	UM3MD	UM3BL	countup	LI1MD	LI1BL	LI2MD	LI2BL	LCMD	LCBL
EMH105	Ain-Mallaha (Eynan)	ancient	1	11590			Y	Ly-1660	11590	540				AncNAT	1							31.54	25.46			2	12.03	7.3	8.05	7.23	8.56	9.03	6.95	9.59	5.87	9.9	10.85	12.86	9.78	12.57			14	5.68	7.07	6.16	7.34	7.16	8.7
EMH16	Ain-Mallaha (Eynan)	ancient	1	11590			M	Ly-1660	11590	540				AncNAT	1											0							8.16	10.08	7.35	10.59	11.05	13.24	11.06	13.44	8.76	13.12	10
EMH18	Ain-Mallaha (Eynan)	ancient	1	11590			M	Ly-1660	11590	540				AncNAT	1				37.46			37.98	32.71	16.16	17.86	5	8.85	7.04	6.79	7.3	7.54	9.2	6.93	9.57	6.76	9.25	10.38	11.93	9.21	12.78	8.1	9.03	16					6.64	8.19
EMH18	Ain-Mallaha (Eynan)	ancient	1	11590			?	Ly-1660	11590	540				AncNAT	1											0											11.33	12.67	10.84	13.18	9.75	12.12	6
EMH23	Ain-Mallaha (Eynan)	ancient	1	11590			F	Ly-1660	11590	540				AncNAT	1				36.48							1	8.36	7.24	6.46	6.23	7.86	8.44	6.3	8.97	5.76	9.06	10.59	11.53	8.82	11.02			14
EMH37	Ain-Mallaha (Eynan)	ancient	1	11590			M	Ly-1660	11590	540				AncNAT	1	67	113	119	33.83	108.94	119.69	37.45	33.84	20.79	17.92	10																	0	4.15	6.67	5.56	7.09	6.99	8.58
EMH80	Ain-Mallaha (Eynan)	ancient	1	11590			M	Ly-1660	11590	540				AncNAT	1	67	107	115	47.58	95.86		38.88	35.43	16.53	18.5	9			7.39	6.1	8.02	7.92	7.37	10	8.39	10.57	9.98	12.3	8.26	13.19	9.07	12.2	14			6.34	6.78	7.25	7.82
EMH87	Ain-Mallaha (Eynan)	ancient	1	11590			M	Ly-1660	11590	540				AncNAT	1				38.07			35.05	33.5	14	17.36	5	9.68	7.59	7.27	7.08	7.53	9.39	7.29	10.86	6.95	10.05	10.95	13.26	10.78	13.58			14	6.06	6.28	6.87	7.14	7.54	9.34
EMH90	Ain-Mallaha (Eynan)	ancient	1	11590			?	Ly-1660	11590	540				AncNAT	1											0					7.61	8.96	6.66	9.75	5.67	10.16	10.72	12.44	9.02	8.31			10
EMH91	Ain-Mallaha (Eynan)	ancient	1	11590			F	Ly-1660	11590	540				AncNAT	1	56	101	127	34.39	99.38	118.74	31.1	24.29	13.22	17.99	10			7.48	7.33	8.24	9.4	7.14	9.86	6.35	9.66	9.37	11.57	8.29	11.18	8.1	9.89	14			6.03	6.45	7.07	8.3
EMH92	Ain-Mallaha (Eynan)	ancient	1	11590			F?	Ly-1660	11590	540				AncNAT	1	56	90	113	33.09			32.54	25.49	14.93	15.36	8	7.68	7.19	6.61	6.79	7.87	9.43							10.27	11.56			8					6.41	8.41
EMH93	Ain-Mallaha (Eynan)	ancient	1	11590			M	Ly-1660	11590	540				AncNAT	1	60	101	118.5	38.72	107.14	124.71	42.05	34.85	16	20.31	10																	0		7.05	5.11	7.47	7.19	9.32
EMH98	Ain-Mallaha (Eynan)	ancient	1	11590			M?	Ly-1660	11590	540				AncNAT	1				40.93			33.41				2																	0
Areq el Ahmar 2	Areq el Ahmar	ancient	1	11500							Garfinkel, 1999			AncNAT	1	61	116	129	39.32	94.15	101.6	35.24	27.21	16.35	15.4	10			5.59	6.81	7.58	7.7	6.88	7.66	6.82	8.22	11.93	11.04	11.54	11.22	10.99	10.99	14			6.25	6.41	7.68	8.81
Areq el Ahmar 3	Areq el Ahmar	ancient	1	11500							Garfinkel, 1999			AncNAT	1											0	8.87	8.4			7.86	9.1	7.31	11.2	7.09	10.17	10.95	12.95	10.16	13.12	9.6	12.07	14
Hayonim H-9	Hayonim	ancient	1	11220							Eshed et al. 2005			Natufian		52	97	114	34.14	104.16			26.15	15.63	16.67	8							6.97	10.06	6.51	9.26	10.59	11.92	10.19	12.76	9.22	11.94	10			6.03	6.33
Hayonim H-11	Hayonim	ancient	1	11220							Eshed et al. 2005			Natufian		60	107					32.69	25.81	14.14	16.6	6							7.06	10.16	5.8	10.16	10.85	12.77	9.92	12.59	7.56	11.81	10			5.72	6.65	6.23	6.82
Hayonim H-15	Hayonim	ancient	1	11220							Eshed et al. 2005			Natufian					39.19				28.43		19.84	3																	0					6.4	6.63
Hayonim H-16	Hayonim	ancient	1	11220							Eshed et al. 2005			Natufian												0					7.28	8.7	7.32	9.77	7.2	9.68	10.08	11.71	8.93	12.37			10	4.55	6.33	4.83	6.52
Hayonim H-17	Hayonim	ancient	1	11220							Eshed et al. 2005			Natufian		57		115	36.66			33.37	27.86	17	18.12	7	9.14	7.17	7.49	6.55	8.44	9.73	6.74	10.04	6.79	10.81	11.64	12.71					12	5.17	6.29	5.41	7.01	7.27	8.13
Hayonim H-19	Hayonim	ancient	1	11220			M				Eshed et al. 2005			Natufian		65	108	125	36.22	96.94	109.77		26.46	15.5	17.97	9			6.65	6.93	7.85	9.12	6.97	10.23	6.68	9.98	10.28	13.32	10.39	13.52	9.63	11.79	14	5.21	6.67	5.72	7.05	7.19	8.79
Hayonim H-20	Hayonim	ancient	1	11220							Eshed et al. 2005			Natufian		63	105	115	41.93	95.74	117.73	34.42	30.21	15.5	17.5	10	8.73	7.54			6.73	7.53	6.6	8.59									6	5.54	6.01	5.66	6.42	6.97	7.55
Hayonim H-24	Hayonim	ancient	1	11220							Eshed et al. 2005			Natufian												0					8.32	9.06	10.65	12.32									4
Hayonim H-25	Hayonim	ancient	1	11220							Eshed et al. 2005			Natufian		61	104	116	37.71	100.3	126.44		31	17.72	22.3	9	9.36	7.67			8.38	9.65	7.76	10.05	6.2	10.17	9.81	11.66	8.78	12.31	8.86	11.68	14			7.27	9.27	7.47	8.42
Hayonim H-26	Hayonim	ancient	1	11220			Y				Eshed et al. 2005			Natufian												0	8.31	7.25	6.6	6.31	7.63	8.39	7.46	9.75	6.24	9.65	10.72	12.42					12	4.95	6.09
Hayonim H-27	Hayonim	ancient	1	11220			F				Eshed et al. 2005			Natufian		63	100	118	34.81	91.55	113.84		28.02	17.12	18.61	9						7.17	8.46										2
Hayonim H-33	Hayonim	ancient	1	11220							Eshed et al. 2005			Natufian									30.13	15.44	15.92	3	9.19	7.48			8.16	9.45	6.85	10.39	7.25	10.04					10.19	11.41	10			5.47	6.91	6.28	8.14
RAK 1	Rakefet	receny& Final	2	10980							Eshed et al. 2005			MidNat	2											0	8.82	7.18	6.67	6.82	7.76	8.71	6.19	9.96	6.49	9.65	10.2	11.76	10.12	12.1	10.42	11.85	16
RAK 2	Rakefet	receny& Final	2	10980							Eshed et al. 2005			MidNat	2	55	99	120		80.04			25.94	15.91	14.95	7																	0					6.82	7.18
RAK 3	Rakefet	receny& Final	2	10980							Eshed et al. 2005			MidNat	2											0					7.34	8.35					12.17	11.11	11.13	10.88			6	9.87	7.59	7.72	6.81	8.62	8.82
RAK 4	Rakefet	receny& Final	2	10980							Eshed et al. 2005			MidNat	2											0																	0
NOH13	Nahal Oren	middle	2	10900			M				Eshed et al. 2005			MidNat	2	62	105	119	34.77	90.98	121.31	33.37	30.38	14	15.5	10																	0	4.71	5.48	4.69	5.03	6.87	7.71
NOH14	Nahal Oren	middle	2	10900			F				Eshed et al. 2005			MidNat	2	65	106	121	37.19	86.23	115.56	33.31	27.85	13	14	10	9.67	7.55	7.1	6.68	7.96	8.09	6.78	10.14	6.09	10.1	10.24	12.21	9.03	12.07	10.57	11.32	16	5.71	6.53	6.64	6.39	7.19	6.03
NOH16	Nahal Oren	middle	2	10900			?				Eshed et al. 2005			MidNat	2	62	101	129	34.9	84.99	104.74	32.82	26.64	15	17	10	8.76	7.87	6.93	5.82	6.99	8.63	7.34	10.47	6.61	10.15	11.4	12.74	11.12	12.14	8.57	11.89	16	5.75	6.58	5.67	7.13	6.98	8.53
NOH16	Nahal Oren	middle	2	10900			?				Eshed et al. 2005			MidNat	2				32.18			36.01	32.59	13.5	19	5																	0	5.76	6.42	6.26	7.47	6.51	8.29
NOH17	Nahal Oren	middle	2	10900							Eshed et al. 2005			MidNat	2											0					5.68	6.81	6.64	7.49	7.14	10.45	7.02	10.42	9.78	12.17	9.33	12.29	12
NOH18	Nahal Oren	middle	2	10900							Eshed et al. 2005			MidNat	2	55	105	120	39.96	101.46		33.76	32.55	16	23.71	9	8.6	7.6		8.53			6.34	9.55	6.53	9.43	10.09	12.36	8.79	11.56			11
NOH21	Nahal Oren	middle	2	10900			M				Eshed et al. 2005			MidNat	2											0																	0
NOH23	Nahal Oren	middle	2	10900			M				Eshed et al. 2005			MidNat	2	60	103	116	35.82	100.18	114.77	34.69	31.53	16	19	10																	0	4.12	6.61	4.62	6.37	5.84	7.74
NOH24	Nahal Oren	middle	2	10900			F				Eshed et al. 2005			MidNat	2		97	128	31.8	97.22		33.03	25.36	15.32	14.97	8	9.2	7.59	6.83	6.16	6.32	9.56	5.54	10.29	6.61	10.42	10.56	12.97	9.66	12.5	9.66	10.86	16					6.25	7.61
NOH26	Nahal Oren	middle	2	10900			?				Eshed et al. 2005			MidNat	2				37.51							1																	0
Hayonim H-8	Hayonim	recent	2	10900			M				Eshed et al. 2005			Natufian					33.65	96.82		32.9	30.56	13	15	6	8.8	7.47	7.31	6.92	7.73	9.1	6.96	9.74	5.37	9.38	10.77	12.11	9.46	12.29	8.36	11.49	16	4.98	7.05	6.31	7.51	7.28	8.51
Hayonim H-10	Hayonim	recent	2	10900							Eshed et al. 2005			Natufian												0	10.23	7.65	6.9	7.15	8.8	9.81	7.56	10.57	7.59	10.18	10.77	10.14	11.8	12.68	10.84	12.43	16	6.07	6.85	5.87	6.65	7.83	9.1
Hayonim H-28	Hayonim	recent	2	10900							Eshed et al. 2005			Natufian								32.42	32.94	14.73	20.21	4																	0					5.75	8.83
Hayonim H-29	Hayonim	recent	2	10900							Eshed et al. 2005			Natufian		51	99	117	38.6	91.64		30.59	27.18	14.3	16.17	9																	0					6.67	8.27
Hayonim H-29a	Hayonim	recent	2	10900							Eshed et al. 2005			Natufian		63	101	111	38.9	83.37	117.75	36.08	29.85	16	16.83	10																	0	5.95	6.52	6.81	6.75	7.75	7.86
Hayonim H-39	Hayonim	recent	2	10900							Eshed et al. 2005			Natufian												0	9.14	8.12	6.8	7.42	8.09	9.76	7.49	10.58			10.06	13.32					10
Hayonim XIV	Hayonim	recent	2	10900			F				Eshed et al. 2005			Natufian		51						28.91		15.21		3																	0
EMH67	Ain-Mallaha (Eynan)	recent	2	10900			?	Ly-1660	11590	540				MidNat	2											0																	0
EMH34	Ain-Mallaha (Eynan)	recent	2	10900			M	Ly-1660	11590	540				MidNat	2		94	113.5	39.37	101.17		35.41	33.96	17.8	16.64	8	8.65	7.55			7.82	8.93	6.55	9.22	6.76	9.24	10.05	12.05	9.05	11.57	8.86	10.3	14	5.12	6.18	6.2	6.6	6.8	8.13
EMH52	Ain-Mallaha (Eynan)	recent	2	10900			?	Ly-1660	11590	540				MidNat	2							32.79	30.69	15	17.26	4	9.46	7.79	7.22	6.7	7.63	9.47	8.03	10.57	6.77	10.91	11.21	12.47	10.21	12.88	9.33	12.06	16	5.74	6.34	6.2	5.69	7.08	8.14
EMH58	Ain-Mallaha (Eynan)	recent	2	10900			M	Ly-1660	11590	540				MidNat	2											0											8.47	11.11	9.22	11.13	9.41	10.26	6
EMH60	Ain-Mallaha (Eynan)	recent	2	10900			?	Ly-1660	11590	540				MidNat	2											0		7.72	7.56	5.94	6.33	7.06	8.7	9.65	6.74	9.49	6.36						10
EMH69	Ain-Mallaha (Eynan)	recent	2	10900			F	Ly-1660	11590	540				MidNat	2	54	97	112	38.03	85.11		31.89	26.31	15.43	16.76	9																	0	5.3	6.61	6.33	7.31	7.52	9.32
EMH70	Ain-Mallaha (Eynan)	recent	2	10900			M	Ly-1660	11590	540				MidNat	2		104	121	40.75			42.55	34.85	15,3	18.59	6																	0	4.61	6.54	4.15	6.98	7.62	8.66
EMH71	Ain-Mallaha (Eynan)	recent	2	10900			F	Ly-1660	11590	540				MidNat	2	53	85	124	32.65	94.26		32.25	29.28	14.37	14.58	9									6.3	8.73	9.09	11.41	9.53	11.26	8.71	10.52	8	5.51	5.93	5.1	5.53	6.33	6.92
EMH79	Ain-Mallaha (Eynan)	recent	2	10900				Ly-1660	11590	540				MidNat	2											0					7.57	8.71	6.95	9.21	6.51	9.72	11.45	12.84	10.28	12.73			10
NOH31	Nahal Oren	late	3	10490			?				Eshed et al. 2005			LATNAT	3	59	102	123	33.29	101.17	120.23	31.05	29.14	13.91	14.41	10																	0	4.65	6			6.85	8.12
NOH34	Nahal Oren	late	3	10490			?				Eshed et al. 2005			LATNAT	3	60										1			6.23	5.87	6.73	7.78	5.46	9.11	5.78	9.18	10.07	10.82	7.76	10.18			12
NOH40	Nahal Oren	late	3	10490			M				Eshed et al. 2005			LATNAT	3	62	102	122	35.09	102.24	123.27	34.95	31.1	15.67	18.81	10	8.49	7.58	6.83	6.55			6.69	9.5									6
NOH42	Nahal Oren	late	3	10490			F?				Eshed et al. 2005			LATNAT	3	59	97	124	34.63	93.14	117.66	31.91	25.78	14.13	19.46	10					8.09	8.31	7.3	9	6.54	9.23	9.81	11.09	8.94	10.85	7.89	10.35	12	5.72	6.17	6.81	6.6	7.41	7.74
NOH43	Nahal Oren	late	3	10490			?				Eshed et al. 2005			LATNAT	3		95		36.33	92.28		33.79	26.35	13	18	7	9.15	7.75	7.37	6.8	8.01	9.3	7.51	10.7	6.9	10.55	11.62	13.37	9.55	14.04			14	5.85	6.29	6.65	6.7	6.93	7.2
NOH48	Nahal Oren	late	3	10490			F				Eshed et al. 2005			LATNAT	3							29.94	28.84	12.89	14.19	4					6.99	9.45	6.54	9.84	5.62	9.44	10.01	11.56	9.78	11.88	8.37	11.06	12	5.21	6.04	5.11	6.07	6.69	7.28
EM157	Ain-Mallaha (Eynan)	final	3	10400				Ly-1660	11590	540				LATNAT	3	57	85	119	36.55	92.28			25.85	15.45	17.42	8	9	6.82	6.99	6.82	7.08	8.51	6.43	8.97	6.28	8.81	7.66	10.7					12
EM156	Ain-Mallaha (Eynan)	final	3	10400			M	Ly-1660	11590	540				LATNAT	3	53	102	127	33.73	93	124.34	34.38	31.47	15.5	18.77	10	9.37	7.7	7.93	6.99	7.14	8.65	7.18	9.66	6.31	10.42	11.12	12.79	8.96	12.25			14	5.55	7.04	6.76	8.56	6.49	8.52
EM154	Ain-Mallaha (Eynan)	final	3	10400			M	Ly-1660	11590	540				LATNAT	3	63	97		41.32	93.5		38.92	34.09	17	16.93	8	8.13	6.62					7.31	8.63	6.49	10.23	9.53	11.61			9.5	11.95	10	4.66	5.8	5.38	6.36	7.27	6.25
EM166	Ain-Mallaha (Eynan)	final	3	10400				Ly-1660	11590	540				LATNAT	3											0	9.58	7.28	6.23	6.14	7.9	8.89	6.61	9.44	6.28	9.36	12.76	12.53	9.91	10.45	10.52	11.98	16
EM168	Ain-Mallaha (Eynan)	final	3	10400			F	Ly-1660	11590	540				LATNAT	3	60	91	123,5	36.23	81.59		33.87	29.89	11	16.89	8			6.12	6.58			6.5	9.13	5.66	9.28	9.55	10.47					8	4.71	7.04	5.16	6.95	6.12	8.2
EM170	Ain-Mallaha (Eynan)	final	3	10400			F	Ly-1660	11590	540				LATNAT	3				30.92				25.99	13.49	14.32	4					5.91	8.4	4.59	8.37	6.65	9.1	8.97	11.41	7.39	12.64	8.58	11.78	12
EMH10-11	Ain-Mallaha (Eynan)	final	3	10400			M	Ly-1660	11590	540				LATNAT	3	61	96	119	37.89	90.83		40.68	33.31	16.5	19.09	9					7.83	9.32	6.59	9.13	6.76	7.92							6	5.08	6.09	5.85	6.51	7.08	8.4
EMH101	Ain-Mallaha (Eynan)	final	3	10400			F	Ly-1660	11590	540				LATNAT	3		83	126	32.99			28.96	27.69	15.32	17.91	7	9.67	7	6.99	6.71	7.91	8.7	6.63	9.41	6.61	8.62	10.86	11.6	10.22	12	7.11	10.87	16					7.37	7.41
EMH103	Ain-Mallaha (Eynan)	final	3	10400			F	Ly-1660	11590	540				LATNAT	3								25.06		17.78	2					7.56	8.86	7.43	10.28	6.87	10.23	10.73	12.51	9.63	12.62			10
EMH12	Ain-Mallaha (Eynan)	final	3	10400			?	Ly-1660	11590	540				LATNAT	3											0					6.83	7.99	7	9.67	5.73	9.19							6
EMH4	Ain-Mallaha (Eynan)	final	3	10400			F?	Ly-1660	11590	540				LATNAT	3								28.3			1	8.51	7.01			7.5	8.79	7.1	9.96	6.67	9.52	9.47	11.47					10
EMH51	Ain-Mallaha (Eynan)	final	3	10400			?	Ly-1660	11590	540				LATNAT	3											0	8.85	7.26			6.51	8.81											4
EMH61	Ain-Mallaha (Eynan)	final	3	10400			M	Ly-1660	11590	540				LATNAT	3				35.72						15.47	2							7.6	9.68	6.75	9.61	10.29	11.84	8.3	11.9	8.98	11.43	10
EMH66	Ain-Mallaha (Eynan)	final	3	10400			M	Ly-1660	11590	540				LATNAT	3	66	91	114	36.81	99			31.16	12.91	15.06	8																	0					6.38	7.98
EMH7	Ain-Mallaha (Eynan)	final	3	10400			?	Ly-1660	11590	540				LATNAT	3											0					6.7	7.63	7.03	9.33	5.47	9.44	9.95	11.64	9.12	11.73			10
Hatoula 1	Hatoula		4	10030				GifA-91360	10030	140				PPNA	4											0	9.2	7.95	7.16	6.22	8	9.47	7.52	9.39	7	10	10.85	11.04	9.05	12.26	9.99	11.62	16
Hatoula 85	Hatoula		4	10030				GifA-91360	10030	140				PPNA	4											0	9.03	7.71	7.49	6.9	7.59	9.13	7.25	9.32	6.76	9.2	10.31	11.48	9.74	12.04	7.45	9.97	16
Hatoula 88_07	Hatoula		4	10030				GifA-91360	10030	140				PPNA	4	50	105	126	31.39	84.43	107.84	30.59	23.66	14.06	15.45	10																	0	5.36	6.2	5.37	6.49	6.48	7.28
Hatoula 88_08	Hatoula		4	10030				GifA-91360	10030	140				PPNA	4							33.39	29.09	15.19	17.05	4	8.26	7.53	7.37	7.32	7.05	8.34	6.62	9.3	6.07	9.11	9.53	11.12	8.34	10.55	8.89	10.03	16					5.81	7.72
Hatoula 88_09	Hatoula		4	10030				GifA-91360	10030	140				PPNA	4											0																	0					5.77	6.67
Hatoula 88_10	Hatoula		4	10030				GifA-91360	10030	140				PPNA	4	56	105	115	35.76					13.19	15.75	6					7.35	8.56	6.53	9.41	7	10.24	9.27	11.96	9.1	11.5			10
Hatoula 85_05	Hatoula		4	10030				GifA-91360	10030	140				PPNA	4	62	100	113	36.81	100.67	113.41	32.23	28.33	14.22	18.35	10																	0	5.39	6.27	5.97	6.45	6.95	8.36
JpF4_22b#7	Jericho		4	9551				BM-1327	9551	63				PPNA	4	57	102	114	33	99	126	35	33.5	8	18.6																			6.3	6.5	6.88	6.46	7.7	8.66
JPF4_23	Jericho		4	9551				BM-1327	9551	63				PPNA	4	55	109	116	40.3	87	111	32.2	32.5	9	17																					5.9	6.12	5.89	7.14
JPF1954_2_3_1	Jericho		4	9551				BM-1327	9551	63				PPNA	4	65	113	126	36.1	100.4	129	35	28.3	9.6	20.4
Jp F4 22 B Burial 6B	Jericho		4	9551				BM-1327	9551	63				PPNA	4																																	7.25	7.49
Jp F 4 22B 6 1	Jericho		4	9551				BM-1327	9551	63				PPNA	4
JP F4 22 B 3-4	Jericho		4	9551				BM-1327	9551	63				PPNA	4
JpF4_22b#4	Jericho		4	9551				BM-1327	9551	63				PPNA	4	65	102	118	33.9	106	120	36	31.8	8.7	15.8																						7.11		8.33
1958.28.10.1	Jericho		4	9551										PPNA	4	55	96	121	31.17	93.92	114.3	25.55	24.42	15.36	17.48																			5.85	5.71	6.1	5.95	7.72	8.18
Burial 374 JP F4 22B	Jericho		4	9551										PPNA	4				37				30		17.66
Burial £ &4 JP F4 22b	Jericho		4	9551										PPNA	4	59	104		33.9		101	30	27.9	19	15.6																			5.36	6.16	6	6.07	6.69	6.4
JP B 6.7 Sk B 6/1	Jericho		4	9551										PPNA	4																																	7.92	7.67
Yiftahel P19D7	Yiftahel		5	8870				Pta-4242	8870	90				PPNB	5		99		32.85			31.07	29.75	15	15	6																	0	5	6.03	5.9	5.51	6.78	7.32
Yiftahel H1	Yiftahel		5	8870				Pta-4242	8870	90				PPNB	5											0	7.67	6.78			7.81	9.41	7.06	9.04	6.77	9.44			9.58	11.82			10	5.21	6.05			7.15	8.57
Yiftahel H2	Yiftahel		5	8870				Pta-4242	8870	90				PPNB	5	60	100	123	34.89	95.5	124	33	32.26	15	18	10	9.21	7.53	6.28	6.65					7.94	8.79			9.72				7					7.14	7.64
Yiftahel H3	Yiftahel		5	8870				Pta-4242	8870	90				PPNB	5									14.6	15.7	2															7.41	9.61	2
Yiftahel 42	Yiftahel		5	8870				Pta-4242	8870	90				PPNB	5											0																	0
Yiftahel 44	Yiftahel		5	8870				Pta-4242	8870	90				PPNB	5											0							6.69	9.12									2
Js E II/VI 15	Jericho		5	8710				BM-253	8710	150				PPNB	5																													5.07	6.58	5.87	7.04	6.81	7.86
JP E 11.18	Jericho		5	8710				BM-253	8710	150				PPNB	5	66	104	111	38			33.68	31.5	16	17.7																			5.8	7.15	7	7.02	7.1	7.96
JpE11_11SKII	Jericho		5	8710				BM-253	8710	150				PPNB	5	62	95	105	36.6	100	119	30.6	33.5	8	20.2																			5.6	6.67	6.28	7	7	7.9
Jp EH 6 B13	Jericho		5	8710				BM-253	8710	150				PPNB	5
JpE11_6#9	Jericho		5	8710				BM-253	8710	150				PPNB	5	59	120	136	35.2	101	127.5	39	38.4	7.9	20.4																							7.34	8.56
JpD10_10	Jericho		5	8710										PPNB	5	65	106	121	35.8	101.6	130	37	36.3	9.6	17																			5.8	6.3	6.46	6.4	6.7	8.3
unnumbered	Jericho		5	8710										PPNB	5																																	7.6	7.9
1992 4.27 14	Jericho		5	8710										PPNB	5																																	6.45	6.29
JpD10_2_4_5	Jericho		5	8710										PPNB	5	61	100	115	36.9	95	125	33.4	33.1	8.1	15.8																							7.19	8.44
Ah 73.847	Abu Hureyra		5	8676	TR C Level 9 Phase Neol			BM-1423	8676	72				PPNB	5
Ah 73.843	Abu Hureyra		5	8676	TR C Level 9 Phase Neol			BM-1423	8676	72				PPNB	5												9.4	7.97	7.6	6.8	8.37	8.91							10.28	11.36	8.97	11.06
Ah 72.558	Abu Hureyra		5	8676	TR C Level 39 Phase Neol			BM-1423	8676	72				PPNB	5																						10.65	11.96	10.03	12.06
Ah 72.550	Abu Hureyra		5	8676	TR C Level 39 Phase Neol			BM-1423	8676	72				PPNB	5
Kefar Hahoresh 04	Kefar Hahoresh		5	8650							Garfinkel, 1999			PPNB	5											0	9.97	7.67	8.73	7.43	8.56	9.24					11.24	12.58	10.2	12.91			10	5.83	6.63	6.41	6.32	7.17	8.3
Kefar Hahoresh 98	Kefar Hahoresh		5	8650							Garfinkel, 1999			PPNB	5											0	8.3	6.77	6.52	5.87	6.84	7.49	7.94	8.52	6.67	8.51	10.8	11.68					12	5.65	5.89	6.43	6.55	6.89	7.91
Kefar Hahoresh 98 1156 n29	Kefar Hahoresh		5	8650							Garfinkel, 1999			PPNB	5				37.71			34.41	33.31			3																	0					6.69	8.81
Kefar Hahoresh R57C	Kefar Hahoresh		5	8650							Garfinkel, 1999			PPNB	5											0							7.68	9.58									2
Kefar Hahoresh 1162 Q57	Kefar Hahoresh		5	8650							Garfinkel, 1999			PPNB	5											0																	0
Kefar Hahoresh 1156 954	Kefar Hahoresh		5	8650							Garfinkel, 1999			PPNB	5											0																	0
Kefar Hahoresh 97 l1110	Kefar Hahoresh		5	8650							Garfinkel, 1999			PPNB	5											0																	0
Kefar Hahoresh 96 H5	Kefar Hahoresh		5	8650							Garfinkel, 1999			PPNB	5											0																	0					6.46	7.56
Kefar Hahoresh 98 1251 118	Kefar Hahoresh		5	8650							Garfinkel, 1999			PPNB	5							34.71	28.44	14	21	4	8.93	6.99	6.01	6.42	7.82	8.45	6.41	9.29	6.56	9.4	10.63	12.02	9.52	11.38	8.58	10.44	16	5.54	6.14	5.85	6.52	6.65	7.73
Kefar Hahoresh 98 1251 1	Kefar Hahoresh		5	8650							Garfinkel, 1999			PPNB	5											0																	0			6.56	6.04
Kefar Hahoresh 98 1251 R54	Kefar Hahoresh		5	8650							Garfinkel, 1999			PPNB	5											0																	0
Kefar Hahoresh 98 1251 232	Kefar Hahoresh		5	8650							Garfinkel, 1999			PPNB	5											0																	0
Kefar Hahoresh 98 1251 133	Kefar Hahoresh		5	8650							Garfinkel, 1999			PPNB	5											0	8.32	7.02															2
Kefar Hahoresh 99 1373 808	Kefar Hahoresh		5	8650							Garfinkel, 1999			PPNB	5							29.65	27.56	15.21	18.71	4																	0	5.45	6	6.26	6.41	7.46	8.13
Kefar Hahoresh 98 1157 28	Kefar Hahoresh		5	8650							Garfinkel, 1999			PPNB	5	61		117					29.06		17.92	4																	0					6.2	7.29
Kefar Hahoresh 96 o52	Kefar Hahoresh		5	8650							Garfinkel, 1999			PPNB	5											0	9	7.25															2
Kefar Hahoresh 99 C55	Kefar Hahoresh		5	8650							Garfinkel, 1999			PPNB	5											0			6.03	6.23													2
Kefar Hahoresh 98 J60	Kefar Hahoresh		5	8650							Garfinkel, 1999			PPNB	5											0	9.35	7.08									9.58	10.98					4
Kefar Hahoresh 98 A58	Kefar Hahoresh		5	8650							Garfinkel, 1999			PPNB	5											0	8.84	7.08															2
Kefar Hahoresh 99 F59	Kefar Hahoresh		5	8650							Garfinkel, 1999			PPNB	5											0					7.9	8.06											2
Kefar Hahoresh 94 Q54	Kefar Hahoresh		5	8650							Garfinkel, 1999			PPNB	5									`		0	7.5	7.12															2
Kefar Hahoresh 99 H52	Kefar Hahoresh		5	8650							Garfinkel, 1999			PPNB	5											0			6.6	6.78													2
Kefar Hahoresh 94 H51	Kefar Hahoresh		5	8650							Garfinkel, 1999			PPNB	5											0																	0
Kefar Hahoresh 99 W	Kefar Hahoresh		5	8650							Garfinkel, 1999			PPNB	5											0									7.91	8.84							2
Kefar Hahoresh 94 Q56	Kefar Hahoresh		5	8650							Garfinkel, 1999			PPNB	5											0									7.2	8.83							2
Kefar Hahoresh 99 L52	Kefar Hahoresh		5	8650							Garfinkel, 1999			PPNB	5											0																	0
Kefar Hahoresh 92 L5002	Kefar Hahoresh		5	8650							Garfinkel, 1999			PPNB	5											0																	0	5.82	5.38
Kefar Hahoresh 92 L1001	Kefar Hahoresh		5	8650							Garfinkel, 1999			PPNB	5											0																	0			5.81	6.32
Kefar Hahoresh 98 R561	Kefar Hahoresh		5	8650							Garfinkel, 1999			PPNB	5											0	8.16	7.56							7.08	9.3	10.51	12.23					6
Kefar Hahoresh 92 1016	Kefar Hahoresh		5	8650							Garfinkel, 1999			PPNB	5											0			6.82	6.81													2
Kefar Hahoresh 99 P54	Kefar Hahoresh		5	8650							Garfinkel, 1999			PPNB	5											0											11.82	12.48					2
Kefar Hahoresh 92 L55a	Kefar Hahoresh		5	8650							Garfinkel, 1999			PPNB	5											0																	0			7.19	7.85
Kefar Hahoresh 92 C55a	Kefar Hahoresh		5	8650							Garfinkel, 1999			PPNB	5											0							7.31	9.39									2
Kefar Hahoresh 98 1155 128	Kefar Hahoresh		5	8650							Garfinkel, 1999			PPNB	5	57	108	116	40.04			32.85	28.41	16.42	20.06	8																	0			6	6.05	7.16	7.57
Kefar Hahoresh 98 325	Kefar Hahoresh		5	8650							Garfinkel, 1999			PPNB	5								30.66		15.47	2																	0					7.3	8.48
Kefar Hahoresh 98 42	Kefar Hahoresh		5	8650							Garfinkel, 1999			PPNB	5											0																	0
Kefar Hahoresh 98 1156 169	Kefar Hahoresh		5	8650							Garfinkel, 1999			PPNB	5											0																	0
Kefar Hahoresh 98 1155 174	Kefar Hahoresh		5	8650							Garfinkel, 1999			PPNB	5											0													9.92	12.05			2
Kefar Hahoresh 98 1155 173	Kefar Hahoresh		5	8650							Garfinkel, 1999			PPNB	5											0					8	8.36											2
Kefar Hahoresh 98 1155 152	Kefar Hahoresh		5	8650							Garfinkel, 1999			PPNB	5											0			6.95	6.88													2
Kefar Hahoresh 98 1155 143	Kefar Hahoresh		5	8650							Garfinkel, 1999			PPNB	5											0																	0	5.93	5.79
Kefar Hahoresh 98 1155 XX	Kefar Hahoresh		5	8650							Garfinkel, 1999			PPNB	5											0	7.97	7.16	6.74	8.49	7.77	8.91	6.41	9.05	6.43	8.9	10.73	11.62	9.26	10.93	9.74	10.57	16	5.44	5.99	5.66	6.28	7.12	7.68
Kefar Hahoresh 79 1155 Q56	Kefar Hahoresh		5	8650							Garfinkel, 1999			PPNB	5											0									6.95	7.71							2
Kefar Hahoresh 97 1155 J52	Kefar Hahoresh		5	8650							Garfinkel, 1999			PPNB	5											0					7.72	8.51											2
Kefar Hahoresh 98 1155 P54	Kefar Hahoresh		5	8650							Garfinkel, 1999			PPNB	5											0											10.42	11.95	11.33	11.56			4
Kefar Hahoresh 99 1353 472	Kefar Hahoresh		5	8650							Garfinkel, 1999			PPNB	5											0			6.94	7.53	7.27	8.44											4	5.89	6.41	6.9	6.7	7.11	7.37
Kefar Hahoresh 97 1185 61	Kefar Hahoresh		5	8650							Garfinkel, 1999			PPNB	5											0																	0
Kefar Hahoresh 99 1353 504	Kefar Hahoresh		5	8650							Garfinkel, 1999			PPNB	5	60	107	118	35.43						18.42	5																	0
Kefar Hahoresh 97 1155 Q54a	Kefar Hahoresh		5	8650							Garfinkel, 1999			PPNB	5											0							7.53	9.5									2
Kefar Hahoresh 97 1155 82	Kefar Hahoresh		5	8650							Garfinkel, 1999			PPNB	5											0	9.51	8.05															2
Kefar Hahoresh 97 1155 85	Kefar Hahoresh		5	8650							Garfinkel, 1999			PPNB	5											0	9.07	7.53															2
Kefar Hahoresh 97 1155 Q5bc	Kefar Hahoresh		5	8650							Garfinkel, 1999			PPNB	5											0									8.29	10.57							2
Kefar Hahoresh 97 1155 Q5bb	Kefar Hahoresh		5	8650							Garfinkel, 1999			PPNB	5											0	9.44	6.84															2
Kefar Hahoresh 97 1155 Q5bd	Kefar Hahoresh		5	8650							Garfinkel, 1999			PPNB	5											0			7.04	7.01													2
Kefar Hahoresh 98 1217 100	Kefar Hahoresh		5	8650							Garfinkel, 1999			PPNB	5											0																	0					6.43	7.32
Kefar Hahoresh 97 689	Kefar Hahoresh		5	8650							Garfinkel, 1999			PPNB	5	62	112	125	33.81	98.15	128	30.47	27.98	16	19	10																	0	5.25	5.77	5.84	6.18	6.69	8.27
Kefar Hahoresh 97 226	Kefar Hahoresh		5	8650							Garfinkel, 1999			PPNB	5				34.36						18.12	2																	0
Kefar Hahoresh 97 26	Kefar Hahoresh		5	8650							Garfinkel, 1999			PPNB	5											0																	0
Kefar Hahoresh 97 1003 642	Kefar Hahoresh		5	8650							Garfinkel, 1999			PPNB	5	58	108	122	38				30.75		17.21	6																	0
Kefar Hahoresh 96 1003 25	Kefar Hahoresh		5	8650							Garfinkel, 1999			PPNB	5		112		38			36.16	32.27	16	19.5	6																	0	5.41	6	6.13	6.3	7.25	8.16
Kefar Hahoresh 98 1003 571	Kefar Hahoresh		5	8650							Garfinkel, 1999			PPNB	5	62		117					29.79		18.27	4																	0					5.99	7.06
Kefar Hahoresh 689	Kefar Hahoresh		5	8650							Garfinkel, 1999			PPNB	5	65	108	124	39.24				33.63		18.47	6																	0
Kefar Hahoresh 1003J-52b	Kefar Hahoresh		5	8650							Garfinkel, 1999			PPNB	5								25.11		21	2																	0					6.38	7.89
Kefar Hahoresh 135 16	Kefar Hahoresh		5	8650							Garfinkel, 1999			PPNB	5											0																	0
Kefar Hahoresh 97 1003 933	Kefar Hahoresh		5	8650							Garfinkel, 1999			PPNB	5				37.5							1																	0
Kefar Hahoresh 98 1003 K53	Kefar Hahoresh		5	8650							Garfinkel, 1999			PPNB	5											0					7.35	8.67											2
Kefar Hahoresh 96 1003 6	Kefar Hahoresh		5	8650							Garfinkel, 1999			PPNB	5											0							6.51	8.26									2
Kefar Hahoresh 96 1003 581	Kefar Hahoresh		5	8650							Garfinkel, 1999			PPNB	5											0					7.33	8.18											2
Kefar Hahoresh 96 1003 641	Kefar Hahoresh		5	8650							Garfinkel, 1999			PPNB	5											0					8.2	8.7											2
Kefar Hahoresh 96 1003 432	Kefar Hahoresh		5	8650							Garfinkel, 1999			PPNB	5											0					8.02	7.95											2
Kefar Hahoresh 96 1003 x1	Kefar Hahoresh		5	8650							Garfinkel, 1999			PPNB	5											0					7.07	8.42											2
Kefar Hahoresh 96 1003 553	Kefar Hahoresh		5	8650							Garfinkel, 1999			PPNB	5											0																	0					6.57	7.28
Kefar Hahoresh 98 1003 657	Kefar Hahoresh		5	8650							Garfinkel, 1999			PPNB	5											0					8.33	9.12											2
Kefar Hahoresh 98 1003 713	Kefar Hahoresh		5	8650							Garfinkel, 1999			PPNB	5											0					7.46	8.67											2
Kefar Hahoresh 98 1003 636	Kefar Hahoresh		5	8650							Garfinkel, 1999			PPNB	5											0					7.91	8.42											2
Kefar Hahoresh 98 1003 640	Kefar Hahoresh		5	8650							Garfinkel, 1999			PPNB	5											0																	0	5.49	5.58	6.23	5.84	6.78	7.78
Kefar Hahoresh 97 1003 165	Kefar Hahoresh		5	8650							Garfinkel, 1999			PPNB	5											0																	0
Kefar Hahoresh 97 S54	Kefar Hahoresh		5	8650							Garfinkel, 1999			PPNB	5											0	9.2	6.84															2
Kefar Hahoresh 97 S55	Kefar Hahoresh		5	8650							Garfinkel, 1999			PPNB	5											0																	0
Kefar Hahoresh 1020 53	Kefar Hahoresh		5	8650							Garfinkel, 1999			PPNB	5											0																	0
Kefar Hahoresh 96 Q56 1027	Kefar Hahoresh		5	8650							Garfinkel, 1999			PPNB	5											0																	0					7.64	7.76
Kefar Hahoresh 97 108	Kefar Hahoresh		5	8650							Garfinkel, 1999			PPNB	5											0																	0
Kefar Hahoresh 97 10003 J53	Kefar Hahoresh		5	8650							Garfinkel, 1999			PPNB	5											0																	0			6.18	6.39
Kefar Hahoresh 97 1003 403	Kefar Hahoresh		5	8650							Garfinkel, 1999			PPNB	5											0																	0
Kefar Hahoresh 97 1003 300	Kefar Hahoresh		5	8650							Garfinkel, 1999			PPNB	5											0																	0
Kefar Hahoresh 97 1003 L52	Kefar Hahoresh		5	8650							Garfinkel, 1999			PPNB	5											0							7.84	10.33									2					6.76	7.82
Kefar Hahoresh 97 1003 259	Kefar Hahoresh		5	8650							Garfinkel, 1999			PPNB	5											0	8.67	7.55			8.51	9.92											4
Kefar Hahoresh 97 1003 X3	Kefar Hahoresh		5	8650							Garfinkel, 1999			PPNB	5											0	9.9	7.92	7	6.6													4
Kefar Hahoresh 97 1003 j51C 293	Kefar Hahoresh		5	8650							Garfinkel, 1999			PPNB	5	56	100	126	33.75			32.28	26.64	15.56	19.74	8																	0			6.21	6.37
Banana H4	Banana		5	8650							Hershkovitz PC			PPNB	5											0											10.91	12.11	9.37	12.14			4
Banana H12	Banana		5	8650							Hershkovitz PC			PPNB	5											0					7.44	7.78	6.66	8.95			10.28	11.15					6
Banana H15	Banana		5	8650							Hershkovitz PC			PPNB	5											0													9.56	11.01			2			6.04	7.04	7.03	7.93
Banana H17	Banana		5	8650							Hershkovitz PC			PPNB	5											0					7.59	9.36	7.43	9.21			10.5	12.7	9.12	11.66			8
Banana H18	Banana		5	8650							Hershkovitz PC			PPNB	5											0							7.5	9.89	7.08	9.96	11.05	12.4	10.98	13	10.63	11.95	10
Banana H20	Banana		5	8650							Hershkovitz PC			PPNB	5											0																	0
Abu Gosh 747.1	Abu Gosh		5	8650										PPNB	5											0	8.75	7.75	7.23	7.29	8.46	8.9	7.17	9.81	7.27	9.8	10.66	12.35	12.62	11.32			14
Abu Gosh 747.2	Abu Gosh		5	8650							Garfinkel, 1999			PPNB	5											0							6.98	9.4	6.83	9.27	10.8	11.7	11.37	13.22	9.2	11.37	10
Abu Gosh 843	Abu Gosh		5	8650							Garfinkel, 1999			PPNB	5								28.91		12.57	2																	0
Abu Gosh 29	Abu Gosh		5	8650							Garfinkel, 1999			PPNB	5											0											11.1	10.4					2
Abu Gosh 747.3	Abu Gosh		5	8650							Garfinkel, 1999			PPNB	5											0			6.35	6.14							12.22	11.27	11	12.33			6
Abu Gosh 728	Abu Gosh		5	8650							Garfinkel, 1999			PPNB	5											0	8.65	7.06			7.52	7.09											4
Abu Gosh 747.5	Abu Gosh		5	8650							Garfinkel, 1999			PPNB	5	56	112	125	35.5	87.8	116.5	37.6	33.1	15	17	10																	0	5.71	6.09	6.06	6.66	6.91	7.95
Abu Gosh 747.4	Abu Gosh		5	8650							Garfinkel, 1999			PPNB	5				35.68				33.64			2	8.2	6.92										10.43	10.34	9.88	10.7	10.38	7
Abu Gosh 415	Abu Gosh		5	8650							Garfinkel, 1999			PPNB	5											0			6.26	6.01	7.52	7.76			7.02	7.95	10.5	10.2	9.8	9.75			10
Abu Gosh 798	Abu Gosh		5	8650							Garfinkel, 1999			PPNB	5											0					7	7.72							9.45	11.36	8.56	11.35	6
Abu Gosh 811	Abu Gosh		5	8650							Garfinkel, 1999			PPNB	5				34.65				32.52		16.3	3											10.55	10.8			12.23	10.53	4
Abu Gosh 842	Abu Gosh		5	8650							Garfinkel, 1999			PPNB	5	57	103	122	30.79			31.2	31.56	16.7	19.06	8																	0	5.15	5.64	5.25	6.39	6.37	6.83
Abu Gosh 193	Abu Gosh		5	8650							Garfinkel, 1999			PPNB	5							37.51	34.57	22.27	19	4																	0					6.23	8.58
Abu Gosh 747	Abu Gosh		5	8650							Garfinkel, 1999			PPNB	5										19.3	1																	0			6.15	6.81	6.2	8.19
Abu Gosh 799	Abu Gosh		5	8650							Garfinkel, 1999			PPNB	5							27.75		14.21		2																	0	5.44	5.53	5.76	6.31	6.33	7.57
Abu Gosh 848	Abu Gosh		5	8650							Garfinkel, 1999			PPNB	5											0					7.33	9.3											2
Abu Gosh 739	Abu Gosh		5	8650							Garfinkel, 1999			PPNB	5											0											11.86	10.68					2
Abu Gosh 419	Abu Gosh		5	8650							Garfinkel, 1999			PPNB	5											0																	0			6.14	7
Abu Gosh 700	Abu Gosh		5	8650							Garfinkel, 1999			PPNB	5											0					7.56	8.21			6.41	9.09							4
Abu Gosh 850	Abu Gosh		5	8650							Garfinkel, 1999			PPNB	5											0			6.93	7.04	7.35	7.46	6.4	8.6	6.6	8.81	10	10.22	11.15				11
Abu Gosh430	Abu Gosh		5	8650							Garfinkel, 1999			PPNB	5											0					8.73	9.56											2	5.79	6.73	5.89	6.69
Abu Gosh X	Abu Gosh		5	8650							Hershkovitz PC			PPNB	5											0	9.12	7.54	6.56	6.71	8.22	9.37	6.7	9.05	7.07	9.49	9.76	11.77	9.44	11.77	8.8	11.07	16
Ah 73.851	Abu Hureyra		5	8490	Trench D level 6 Phase 4			OxA-878	8490	110				PPNB	5																		7.93	10.13			10.05	11.8
Ah 73.302	Abu Hureyra		5	8490	Trench D level 6 Phase 4			OxA-878	8490	110				PPNB	5																								9.07	12.42	8.16	10.26
AH_73690	Abu Hureyra		5	8490	Trench D level 8 Phase 2			OxA-878	8490	110				PPNB	5	50	90	124	31	86	99	24	25	9.6	15		8.2	7.38	6.48	6.54							9.98	11.18
Nahal Betzet L3 330	Nahal Betzet		5	8330				RT-1394	8330	100	Garfinkel, 1999			PPNB	5											0																	0
Nahal Betzet L3 230	Nahal Betzet		5	8330				RT-1394	8330	100	Garfinkel, 1999			PPNB	5											0																	0
Nahal Betzet L3 270	Nahal Betzet		5	8330				RT-1394	8330	100	Garfinkel, 1999			PPNB	5											0																	0					7.62	8.69
Nahal Betzet J5 180	Nahal Betzet		5	8330				RT-1394	8330	100	Garfinkel, 1999			PPNB	5											0					7.6	8.32	6.47	9.54									4
Ah 73 2396	Abu Hureyra		5	8330	Trench E level 211 Phase 6			BM-1724R	8020	100				PPNB	5												8.9	7.2	6.4	5.9	7.63	8.08	6.5	8.9	6.2	8.86	10	11.14	8.75	10.69	8.15	10.16				6.03	5.99	6.45	7.02
Ah 73 2398	Abu Hureyra		5	8330	Trench E level 194 Phase 6			BM-1724R	8020	100				PPNB	5												9.36	7.85							7.3	10.17	11.3	11.7	10.47	12.4	8.43	12
Ah 73 B114	Abu Hureyra		5	8330	Trench E Phase 7			BM-1724R	8020	100				PPNB	5
Ah 72.178	Abu Hureyra		5	8330	Trench E level 11 Phase 9			BM-1724R	8020	100				PPNB	5
AH 73.2747	Abu Hureyra		5	8330	trench E level 210 phase 5			Oxa-2168	8330	100				PPNB	5																										8.3	10.43						6.42	7.08
AH 73.3437	Abu Hureyra		5	8330	trench E level 210 phase 5			Oxa-2168	8330	100				PPNB	5												8.3	7.06			7.2	7.8					9.44	10.9
Abu Madi 1	Abu Madi		5	8250							Hershkovitz PC			PPNB	5											0									6.46	8.77	11.35	12.69	9.34	12.81	9.97	11.65	8	5.5	6.13	6.75	6.61	7.78	7.15
Abu Madi Loc 31	Abu Madi		5	8250							Hershkovitz PC			PPNB	5				32.77							1											11.78	12.2	11.04	12.63			4
Abu Madi Loc 31.2	Abu Madi		5	8250							Hershkovitz PC			PPNB	5											0																	0
Abu Madi Loc 31.3	Abu Madi		5	8250							Hershkovitz PC			PPNB	5							31.32	28.62			2																	0					6.56	7.88
AH 73.845	Abu Hureyra		5	8190	TR C Level 9 Phase Neol			BM-1423	8676	72				PPNB	5											0			8	7.6	8.5	9.3					10.9	12.6	10.4	13.5	8.8	12.3	10
AH 73.1186	Abu Hureyra		5	8190	TR B Level 32 Phase 8			BM-1424	8190	77				PPNB	5											0																	0
AH 73	Abu Hureyra		5	8190	Trench B			BM-1424	8190	77				PPNB	5	54.7	107	135	30.5	84.4	97.8	27	25.5	7.9	15	10			5.9	5.9	7	7.7	6.3	8.2	5.8	7.4	10.4	11.2	8	9.6	9	9.5	14					6.2	7.1
Ah 73.177A	Abu Hureyra		5	8190	TR B Level 90 Phase 8			BM-1424	8190	77				PPNB	5												9.6	7.89	7.4	6.44			6.92	9.27	7.13	8.13	12	10.82		10.66	10.09	10.88		5.5	6	6.17	6.3	7.04	8.4
Ah 73.2949	Abu Hureyra		5	8190	TR B Level 90 Phase 8			BM-1424	8190	77				PPNB	5																7.42	8.52								11	9.32	10.74
Bas39-3of4	Basta		5	8155			m	GrN-14538	8155	50		30.23	35.53	PPNB	5		108		38	105		34.7	36.2	10.8	19.6	7					8.2	9.7	7.6	9.7	6.9	9.9	9	11.7	9.6	11.7	9	11.4	12
Bas17	Basta		5	8155			?	GrN-14538	8155	50		30.23	35.53	PPNB	5	56	97		31	94.2	115	34	31	5.6	15.4	9					7.5	9	6.9	9.1			10.5	12.1	8.6	11	9.6	10.6	10
Bas4	Basta		5	8155			f	GrN-14538	8155	50		30.23	35.53	PPNB	5											0																	0
Banana H3	Banana		5	7800							Hershkovitz PC			PPNB	5											0	9.78	6.98	6.59	6.73	7.5	8.69					11.1	11.97					8
Atlit Yam H25	Atlit Yam		6	7755				Pta-3950	8000	90	Garfinkel, 1999			PPNC	6	54	98	125	35.64	99.14	118.99	30.15	27.85	15.19	18.64	10	9.4	6.99	7.02	6.04	7.92	8.81			7.41	9.92	11.15	11.49					10	5.26	5.57			7.12	7.76
Atlit Yam H09	Atlit Yam		6	7755				Pta-3950	8000	90	Garfinkel, 1999			PPNC	6	69	100	108	41.01			33.74		15	15	7	8.61	7.01															2			5.55	6.71	7.01	8.57
Atlit Yam H06	Atlit Yam		6	7755				Pta-3950	8000	90	Garfinkel, 1999			PPNC	6											0											10.35	11.56					2
Atlit Yam H04	Atlit Yam		6	7755				Pta-3950	8000	90	Garfinkel, 1999			PPNC	6											0									7.19	9.04	9.11	11.38	10.72	10.07	12.84		7
Atlit Yam H02	Atlit Yam		6	7755				Pta-3950	8000	90	Garfinkel, 1999			PPNC	6											0					7.07	9.45			7.36	9.71	10.6	12.34					6
Atlit Yam H01	Atlit Yam		6	7755				Pta-3950	8000	90	Garfinkel, 1999			PPNC	6	53	92		35.78	89.9	104.63	28.28	22.95	14.18	18.25	9					7.27	7.83	6.01	8.31	6.21	9.12	9.21	10.91	9.41	10.96			10
Atlit Yam H43	Atlit Yam		6	7755				Pta-3950	8000	90	Garfinkel, 1999			PPNC	6	54	101	111	36.7	93.49	107.14	26.04	25.44	16.17	16.93	10																	0
Atlit Yam H41	Atlit Yam		6	7755				Pta-3950	8000	90	Garfinkel, 1999			PPNC	6		102	104	36.73				27.63	18.23	17.28	6																	0
Atlit Yam H32	Atlit Yam		6	7755				Pta-3950	8000	90	Garfinkel, 1999			PPNC	6											0	8.42	7.1	6.52	6.42	6.73	8.11					10.48	12.32	10.02	12.34	10.06	12.29	12
Atlit Yam H28	Atlit Yam		6	7755				Pta-3950	8000	90	Garfinkel, 1999			PPNC	6											0									6.6	9.27							2	4.69	5.7	6.08	6.57	7.15	7.25
Atlit Yam H29	Atlit Yam		6	7755				Pta-3950	8000	90	Garfinkel, 1999			PPNC	6											0					7.01	7.82					10.6	10.76			8.64	9.4	6			5.39	6.41	6.35	6.75
Atlit Yam H36	Atlit Yam		6	7755				Pta-3950	8000	90	Garfinkel, 1999			PPNC	6	60	108	128	31.39	91.12	106.9	29.12	27.6	15	20.49	10																	0
Atlit Yam H38	Atlit Yam		6	7755				Pta-3950	8000	90	Garfinkel, 1999			PPNC	6	60	99	118	32.81	86.44	105.25	27.84	25.7	15.8	17.52	10																	0	5.72	6.45	6.58	6.18	6.51	7.74
Atlit Yam H40	Atlit Yam		6	7755				Pta-3950	8000	90	Garfinkel, 1999			PPNC	6	62	115	123	40.23	91.52	117.74		30.76	17.06	17.66	9	8.63	6.84	6.63	6.42			6.08	9.04	6.88	9.61	10.48	11.98					10	4.87	5.63	5.73	6.47	6.6	7.87
Atlit Yam H55	Atlit Yam		6	7755				Pta-3950	8000	90	Garfinkel, 1999			PPNC	6											0	8.97	7.34	6.86	7.01	8.03	8.86	7.26	9.53									8
Atlit Yam H54	Atlit Yam		6	7755				Pta-3950	8000	90	Garfinkel, 1999			PPNC	6											0																	0
Atlit Yam H45	Atlit Yam		6	7755				Pta-3950	8000	90	Garfinkel, 1999			PPNC	6											0																	0					6.59	6.82
Atlit Yam H46	Atlit Yam		6	7755				Pta-3950	8000	90	Garfinkel, 1999			PPNC	6											0	8.17	6.83	6.69	6.32			7.02	9.8									6
Atlit Yam H89	Atlit Yam		6	7755				Pta-3950	8000	90	Garfinkel, 1999			PPNC	6	59		126	33.5				25.04		16.67	5																	0
Atlit Yam H83	Atlit Yam		6	7755				Pta-3950	8000	90	Garfinkel, 1999			PPNC	6											0																	0
Atlit Yam H69	Atlit Yam		6	7755				Pta-3950	8000	90	Garfinkel, 1999			PPNC	6	60	103	117	35.72	88.78	123.28	36.32	30.09	16.7	19.27	10																	0
Atlit Yam H63	Atlit Yam		6	7755				Pta-3950	8000	90	Garfinkel, 1999			PPNC	6	52		123	35.19			30.21		14.64		5																	0
Atlit Yam H76	Atlit Yam		6	7755				Pta-3950	8000	90	Garfinkel, 1999			PPNC	6											0									6.84	9.31	9.01	11.42	10.58	10.46	10.03	10.44	8
Atlit Yam H67	Atlit Yam		6	7755				Pta-3950	8000	90	Garfinkel, 1999			PPNC	6											0	9.33	7.67	6.75	7.23	8.03	8.55	6.75	9.53	6.7	9.92	10.65	11.93	9.21	11.66	9.48	11.34	16	6.31	6.39	6.39	6.37	6.45	7.95
Atlit Yam H51	Atlit Yam		6	7755				Pta-3950	8000	90	Garfinkel, 1999			PPNC	6											0																	0			6.32	5.54
Atlit Yam H86	Atlit Yam		6	7755				Pta-3950	8000	90	Garfinkel, 1999			PPNC	6											0																	0				6.9	6.1	7.82
Atlit Yam H85	Atlit Yam		6	7755				Pta-3950	8000	90	Garfinkel, 1999			PPNC	6											0	9.03	6.8									11.87	10.69					4
Atlit Yam H88	Atlit Yam		6	7755				Pta-3950	8000	90	Garfinkel, 1999			PPNC	6	59	106	126	33.89	94.81	115.08	36.58	31.51	19.98	23.09	10	7.94	6.58	6.43	6.04	7.63	8.48	6.55	8.92	6.15	9.35	9.15	10.98	8.03	12.92	8.98	10.21	16					6.93	7.96
Atlit Yam H91	Atlit Yam		6	7755				Pta-3950	8000	90	Garfinkel, 1999			PPNC	6	61	104	120	33.9	88.22	104.1	32.34	28.47	18	19	10	8.48	7.1	7.09	6.41	7.46	8.25	5.82	9.48	5.92	9.52	10.25	11.61	8.64	11.47	8.09	10.41	16	5.2	5.8	6.07	6.23	6.2	7.51
Atlit Yam H92	Atlit Yam		6	7755				Pta-3950	8000	90	Garfinkel, 1999			PPNC	6											0																	0			5.77	6.48	6.25	7.34
Atlit Yam H35	Atlit Yam		6	7755				Pta-3950	8000	90	Garfinkel, 1999			PPNC	6	57	104	125	34.04	89.2	106.55	33.91	29.35	18.29	18.53	10	8.47	7.5	6.86	6.34	8.2	8.26	7.15	9.38	6.32	9.75	11.76	11.17	10.54	12.17	8.96	10.42	16			6.03	6.41	7.16	8.09
TRW L-2067	Tell Roim West		7	7300			F				Garfinkel, 1999			PN	7		77	124	31.9	96.59		32.65	27.93	15	17.5		8.6	8.2			7.77	9.26	6.73	8.31	7.3	9.07			9.98	11.98				5.08	6.92	5.69	6.23	6.94	8.74
TRW L-3040	Tell Roim West		7	7300			M				Garfinkel, 1999			PN	7
TRW L-1057	Tell Roim West		7	7300			F				Garfinkel, 1999			PN	7	57.5	76	125	32.74	92.5	120.05	32.42	28.27	15	18.7		8.28	7.42	6.14	6.06	7.16	8.22	6.8	8.73	5.65	8.99	9.22	11.03	9.32	11.06	8.89	10.79		5.19	5.16	5.64	6.8	6.22	7.28
TRW L-1016	Tell Roim West		7	7300			F				Garfinkel, 1999			PN	7							28.67	28.19	14.5	15																			4.82	5.28	5.92	4.97	6.61	6.12
LOD H-1	Lod		7	7050			F				Garfinkel, 1999			PN	7												8.25	7.05	6.64	6.29	7.8	7.58					9.1	11.47	9.37	11.79				5.12	5.27	5.65	6.65	6.63	7.27
LOD H-2	Lod		7	7050			M				Garfinkel, 1999			PN	7												9.38	7.54	6.34	7.15	6.35	8.58							11.03	11.2	10.89	7.72		4.46	6.08	6.04	4.84	7.04	7.8
LOD H-3	Lod		7	7050			M				Garfinkel, 1999			PN	7				32.75				33.66		19				6.52	7.98	7.79	8.16	7.72	8.48	7.46	8.98	9.7	11.21										6.68	7.15
Neve Yam 5	Neve Yam		7	6565				Pta-3950	8000	90	Garfinkel, 1999			PN	7	54	102	123	33.95	88.25	110.32	28.77	28.31	14.69	18.82	10							6.15	8.4	6.03	8.44	9.52	11.27					6	5.62	5.76	5.69	6.25	5.71	6.93
Neve Yam 4	Neve Yam		7	6565				Pta-3950	8000	90	Garfinkel, 1999			PN	7	55	95	115	32.62	86.69	108.06	29.24	24.1	16.95	15.8	10			5.75	6.04	7.14	8.08					9.57	11.02	8.68	10.78			8	5.39	5.52	5.52	5.48	6.49	6.8
[truncated: 12 more columns]
